# Supplementary material for: The telomerase inhibitor PinX1 is a major haploinsufficient tumor suppressor essential for chromosome stability in mice
Source: JCI journal article supplement (doi:10.1172/jci43452), 2011-03-23
Supplement: sd1 [file 1]

**Table S1. Tumors developed in two independent lines of PinX1+/- mice**

| Mouse ID                              | Tumor-Related Phenotypes                                                |           |                          |
|---------------------------------------|-------------------------------------------------------------------------|-----------|--------------------------|
| <b>PinX1+/- A line (sex) (n=7)</b>    |                                                                         |           |                          |
| A165 (F)                              | Hepatocellular carcinoma                                                |           |                          |
| A951 (M)                              | Lung adenocarcinoma                                                     |           |                          |
| A952 (M)                              | Lung adenocarcinoma                                                     |           |                          |
| A954 (M)                              | Lung adenocarcinoma, chest leiomyosarcoma                               |           |                          |
| A1014 (F)                             | Mammary adenocarcinoma                                                  |           |                          |
| A1016 (F)                             | Mammary adenocarcinoma, lung metastasis                                 |           |                          |
| A1019 (M)                             | Hepatocellular carcinoma                                                |           |                          |
| <b>PinX1+/- B line (sex) (n=45)</b>   |                                                                         |           |                          |
| B441 (M)                              | Histiocytic sarcoma in liver                                            |           |                          |
| B598 (F)                              | Lung adenocarcinoma, small intestine adenomucoitous polyps              |           |                          |
| B619 (F)                              | Hepatocellular carcinoma                                                |           |                          |
| B759 (F)                              | Mammary adenocarcinoma                                                  |           |                          |
| B773 (F)                              | Lung adenocarcinoma                                                     |           |                          |
| B777 (F)                              | Mammary adenocarcinoma, lung metastasis                                 |           |                          |
| B793 (F)                              | Lymphoma                                                                |           |                          |
| B781 (F)                              | Lung adenocarcinoma                                                     |           |                          |
| B816 (F)                              | Lung adenocarcinoma                                                     |           |                          |
| B820 (F)                              | Lung adenocarcinoma, gastric squamous cell adenocarcinoma               |           |                          |
| B845 (F)                              | Mammary adenocarcinoma                                                  |           |                          |
| B872 (F)                              | Skin hyperplasia                                                        |           |                          |
| B916 (M)                              | Lung adenocarcinoma                                                     |           |                          |
| B957 (M)                              | Lung adenoma, hepatoma                                                  |           |                          |
| B960 (M)                              | No tumor                                                                |           |                          |
| B963 (M)                              | Lymphoma in lymph node, liver, spleen, colon                            |           |                          |
| B975 (F)                              | Lung adenocarcinoma, colon adenocarcinoma                               |           |                          |
| B987 (F)                              | Eye Harderian gland adenomar                                            |           |                          |
| B993 (M)                              | Lung adenocarcinoma                                                     |           |                          |
| B1032 (M)                             | Lung adenocarcinoma                                                     |           |                          |
| B1066 (F)                             | Lung adenocarcinoma in both sides and lung metastasis in both sides     |           |                          |
| B1082 (F)                             | Lung adenocarcinoma                                                     |           |                          |
| B1125 (F)                             | Hepatocellular carcinoma                                                |           |                          |
| B1128 (M)                             | No tumor                                                                |           |                          |
| B1130 (M)                             | Lung adenocarcinoma                                                     |           |                          |
| B1148 (F)                             | Lung adenocarcinoma                                                     |           |                          |
| B1158 (F)                             | Hepatocellular carcinoma                                                |           |                          |
| B1159 (F)                             | Lung adenocarcinoma, mammary adenocarcinoma                             |           |                          |
| B1316 (M)                             | Undifferentiated sarcoma                                                |           |                          |
| B1318 (M)                             | Lung adenocarcinoma, hepatocellular carcinoma, liver angiosarcoma       |           |                          |
| B1324 (F)                             | Histiocytic sarcoma in liver, colon and thymus                          |           |                          |
| B1344 (F)                             | Lung adenocarcinoma, hepatocellular carcinoma, mammary adenocarcinoma   |           |                          |
| B1354 (M)                             | Lung adenocarcinoma                                                     |           |                          |
| B1511 (M)                             | Hepatocellular carcinoma                                                |           |                          |
| B1525 (F)                             | Skin hyperplasia                                                        |           |                          |
| B1603 (M)                             | Rectal tumor                                                            |           |                          |
| B1606 (F)                             | Lymphoma                                                                |           |                          |
| B1631 (F)                             | Lymphoma                                                                |           |                          |
| B1675 (F)                             | Colon polyps                                                            |           |                          |
| B1766 (M)                             | Small intestine adenomucoitous polyps                                   |           |                          |
| B1808 (M)                             | Hepatocellular carcinoma                                                |           |                          |
| B1900 (F)                             | Lung adenoma, hepatocellular carcinoma, eye Harderian gland adenoma     |           |                          |
| B1964 (F)                             | No tumor                                                                |           |                          |
| B2037 (F)                             | Mammary adenocarcinoma                                                  |           |                          |
| B2106 (F)                             | Lung adenocarcinoma, hibernoma in leg derived from brown adipose tissue |           |                          |
| <b>PinX1+/+ A+B line (sex) (n=15)</b> |                                                                         |           |                          |
| A950 (M)                              | No tumor                                                                | B1498 (M) | No tumor                 |
| B819 (F)                              | No tumor                                                                | B1530 (F) | No tumor                 |
| B822 (F)                              | No tumor                                                                | B1610 (F) | No tumor                 |
| B844 (F)                              | No tumor                                                                | B1612 (M) | Hepatocellular carcinoma |
| B846 (F)                              | No tumor                                                                |           |                          |
| B916 (M)                              | No tumor                                                                |           |                          |
| B924 (F)                              | No tumor                                                                |           |                          |
| B962 (F)                              | No tumor                                                                |           |                          |
| B998 (M)                              | No tumor                                                                |           |                          |
| B1042 (F)                             | No tumor                                                                |           |                          |
| B1044 (M)                             | No tumor                                                                |           |                          |

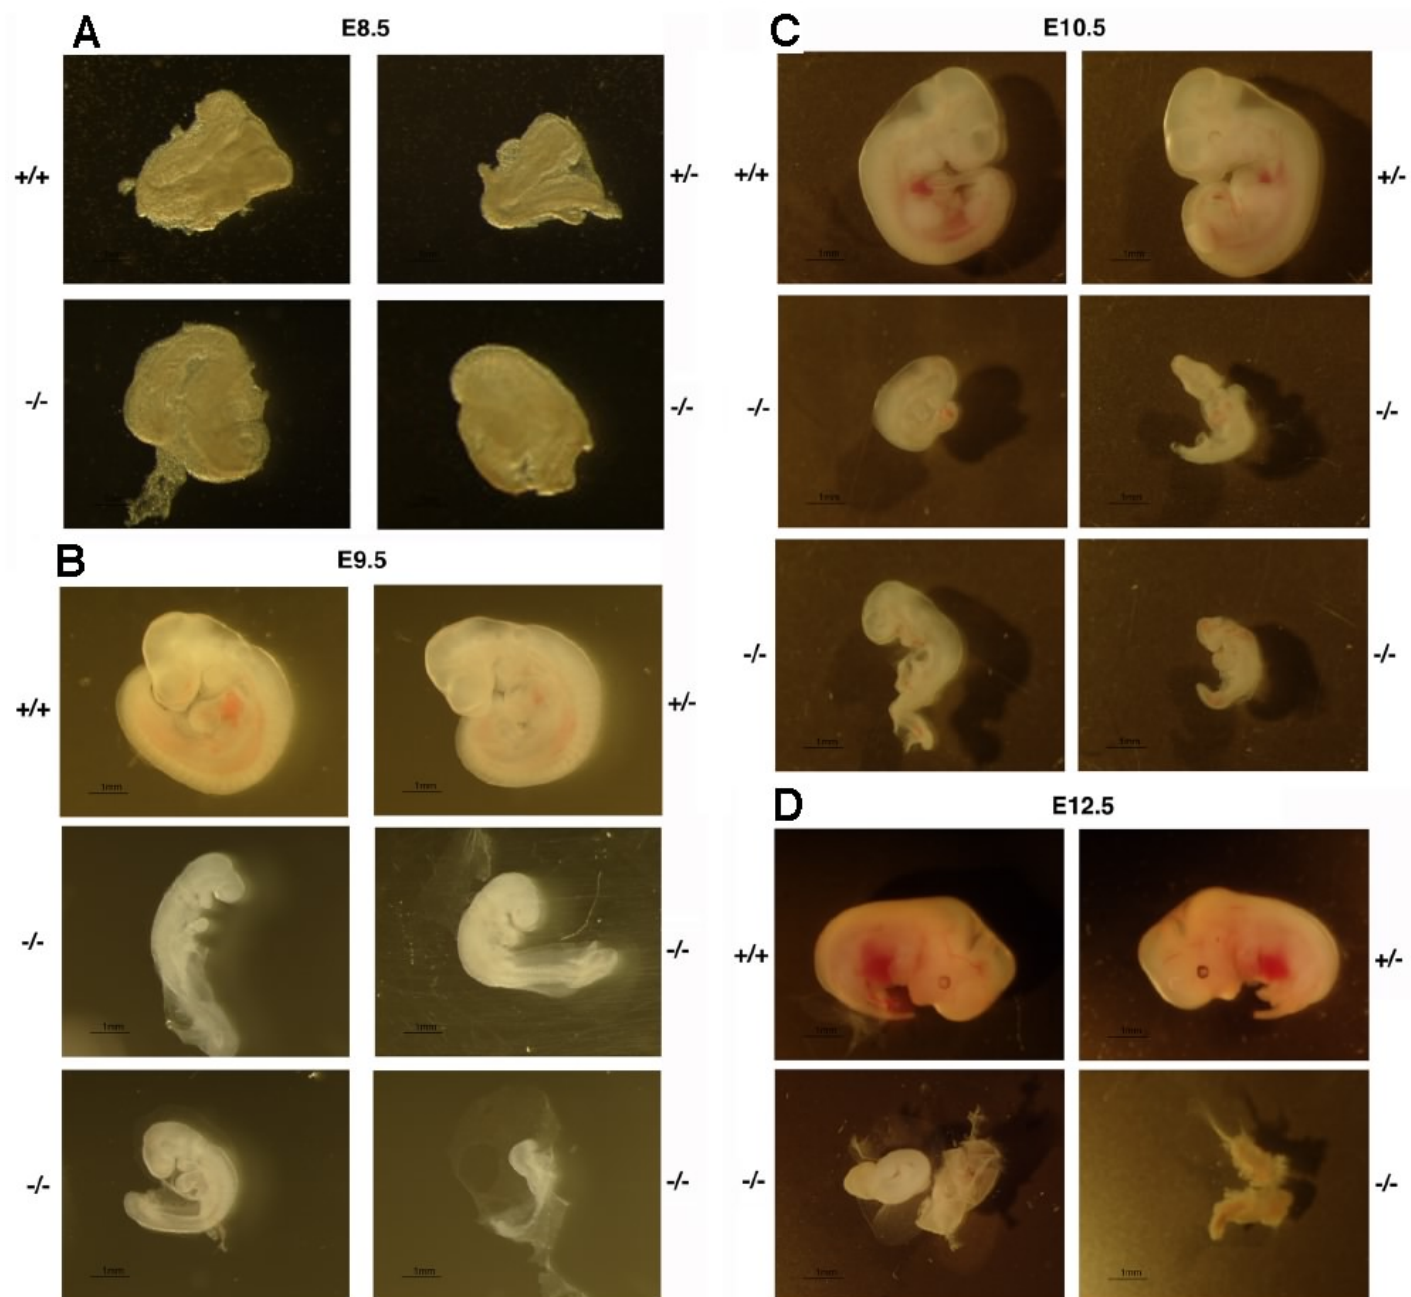

### E Genotypes of offspring from PinX1<sup>+/-</sup> intercrosses

| Stage     | Number of animals with genotypes |     |     |         |    |
|-----------|----------------------------------|-----|-----|---------|----|
|           | Total                            | +/+ | +/- | -/-     | ND |
| Postnatal | 114                              | 55  | 59  | 0       |    |
| E 12.5    | 20                               | 6   | 9   | 0 (5*)  |    |
| E 11.5    | 49                               | 16  | 21  | 0 (7*)  | 5  |
| E 10.5    | 62                               | 17  | 25  | 4 (12*) | 4  |
| E 9.5     | 46                               | 15  | 19  | 6 (6*)  |    |
| E 8.5     | 17                               | 5   | 8   | 4       |    |

Asterisks indicate partially observed embryos. ND, not determined

### Zhou et al., Fig. S1. PinX1-null mice are embryonic lethal.

(A-D) Representative morphologies of PinX1<sup>+/+</sup>, PinX1<sup>+/-</sup> and PinX1<sup>-/-</sup> embryos at 8.5 (A), 9.5 (B), 10.5 (C) and 12.5 (D) days post-conception produced from intercrosses of PinX1<sup>+/-</sup> mice. (E) Summary of genotypes of offspring from PinX1<sup>+/-</sup> intercrosses. The PinX1<sup>+/+</sup> and PinX1<sup>+/-</sup> mouse ratio at F1 and F2 generations was approximately 1:1.1 (48% and 52%). Alive embryos were assayed by the presence of heartbeat.

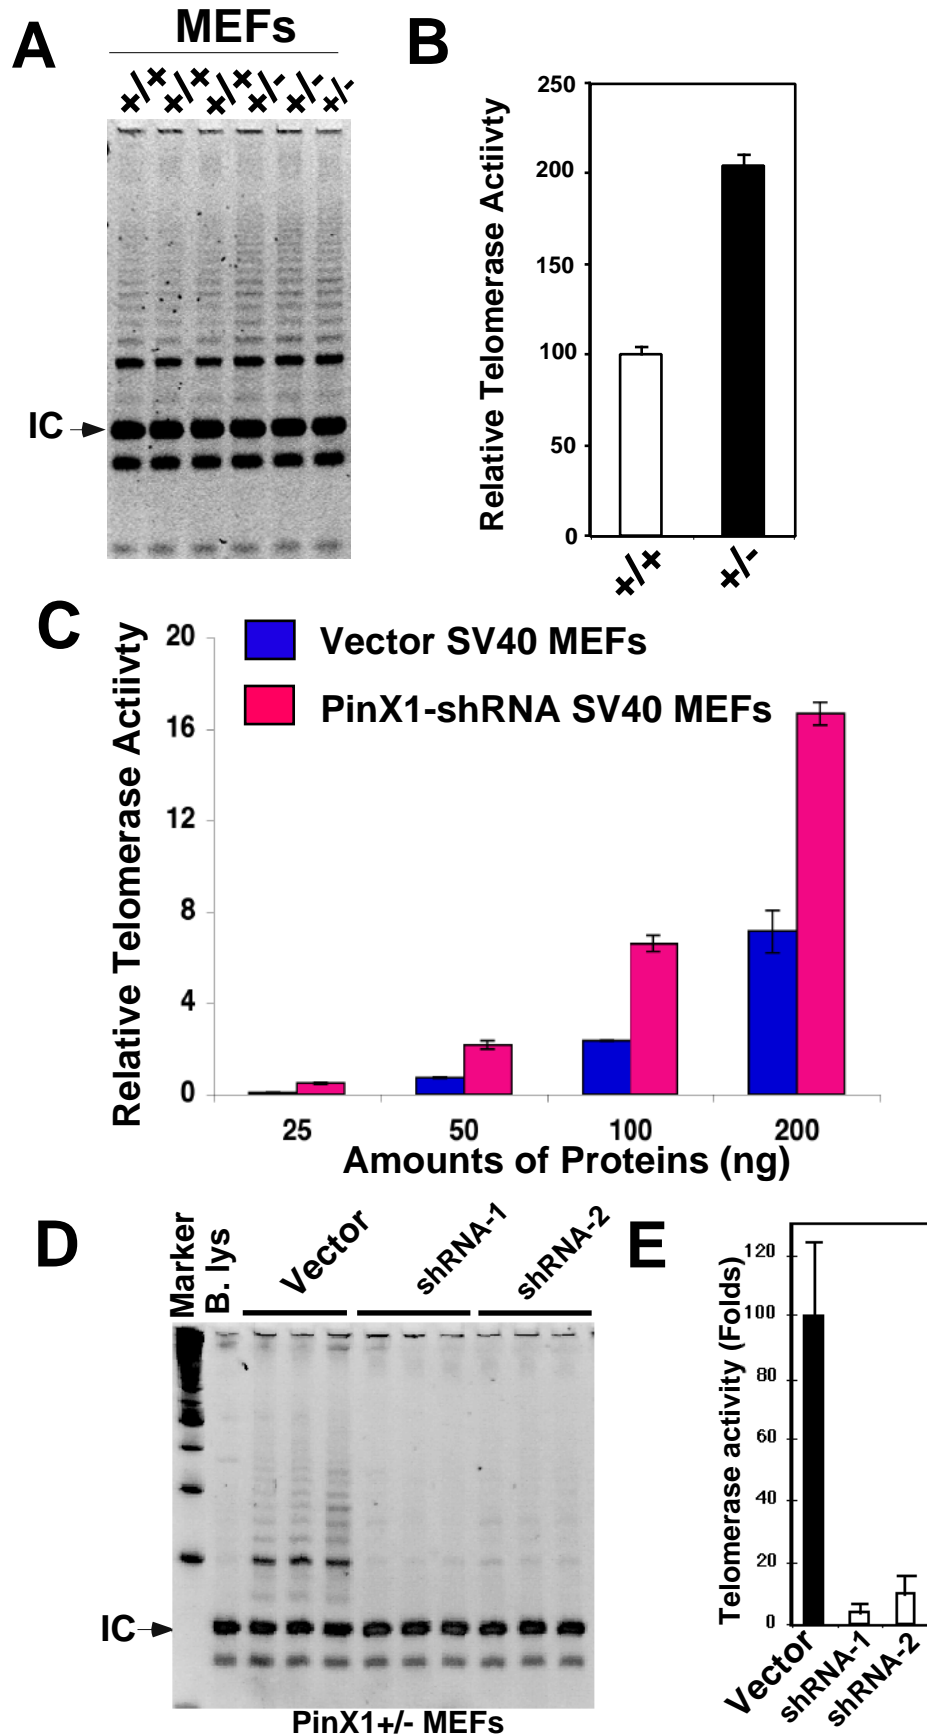

**Zhou et al., Fig. S2. PinX1 heterozygous knockout or knockdown activates telomerase and TERT knockdown inhibits telomerase activation in PinX1 $+/$ - MEFs**

(A, B) PinX1 heterozygous knockout activates telomerase in MEFs. Telomerase activity in three independent PinX1 $+/$  and PinX1 $+/$ - MEF lines were assayed by TRAP assay (A), followed by semi-quantification with the vector being set at 100% (B). (C) PinX1 knockdown activates telomerase in SV40-immortalized MEFs. SV40 immortalized MEFs stably expressing PinX1-shRNA or vector control were subjected to TRAP assay (Fig. 4E), followed by semi-quantification, with the ratios between telomerase products and the internal control (IC) being shown. (D) TERT knockdown inhibits telomerase activation in PinX1 $+/$ - MEFs. PinX1 $+/$ - MEF pools stably expressing two different TERT-shRNA constructs or vector control were subjected to TRAP assay, followed by semi-quantification, with the vector being set at 100% (E).

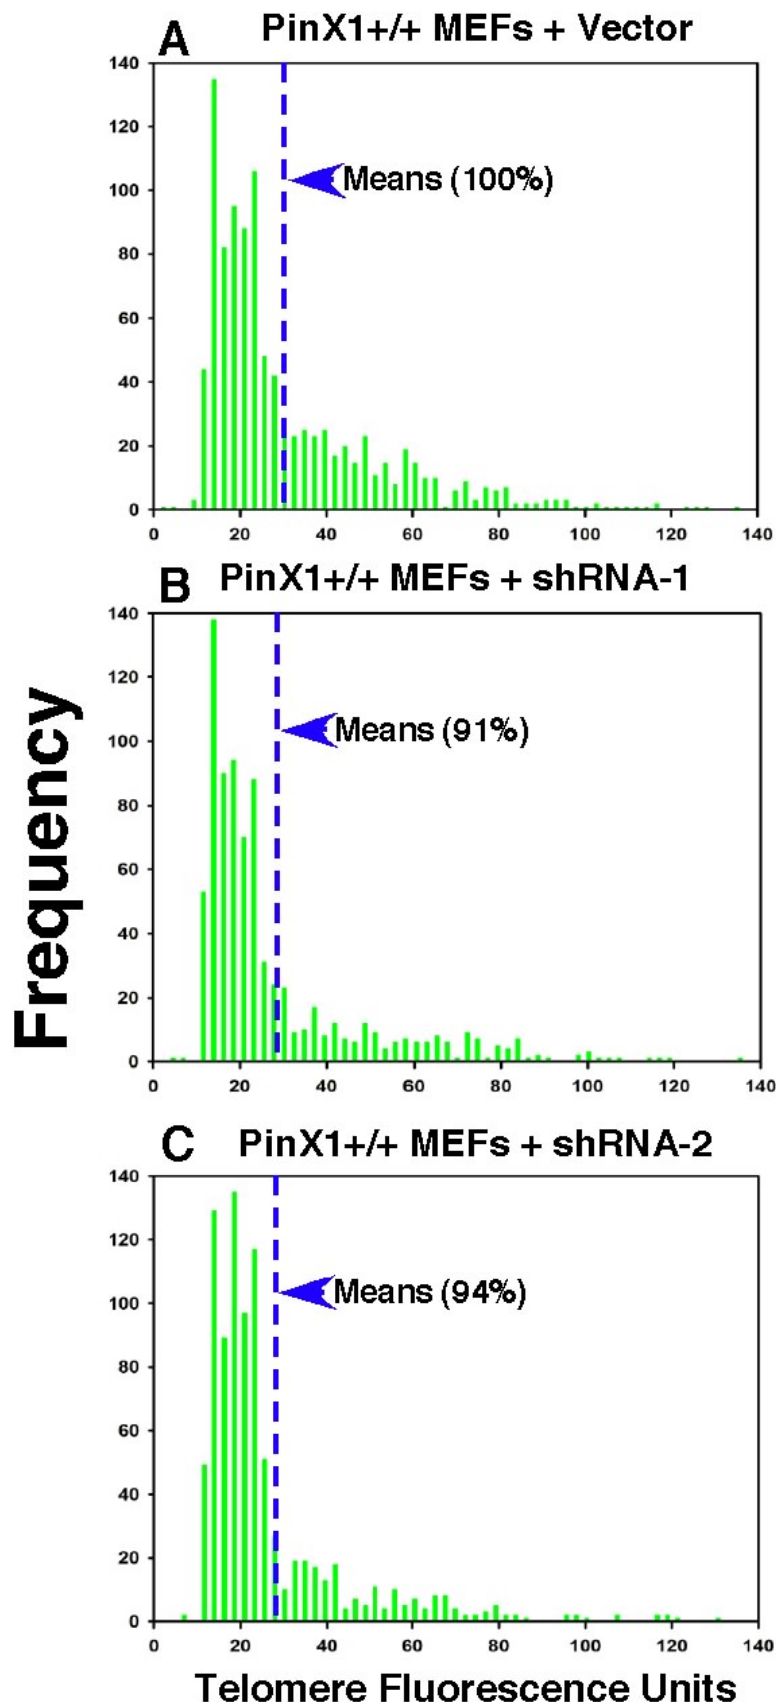

**Zhou et al., Fig. S3. TERT knockdown does not affect telomere length in PinX1<sup>+/+</sup> MEFs.** PinX1<sup>+/+</sup> MEFs at passage 3 were infected with two different TERT-shRNA lentiviruses (-1 or -2) (B, C) or vector control viruses (A), followed by selection for stable cell pools. After 20 passage, cells were fixed and subjected to qFISH analysis. There was not obvious difference in telomere lengths between TERT-shRNA-1 or -2 cells and control cells.

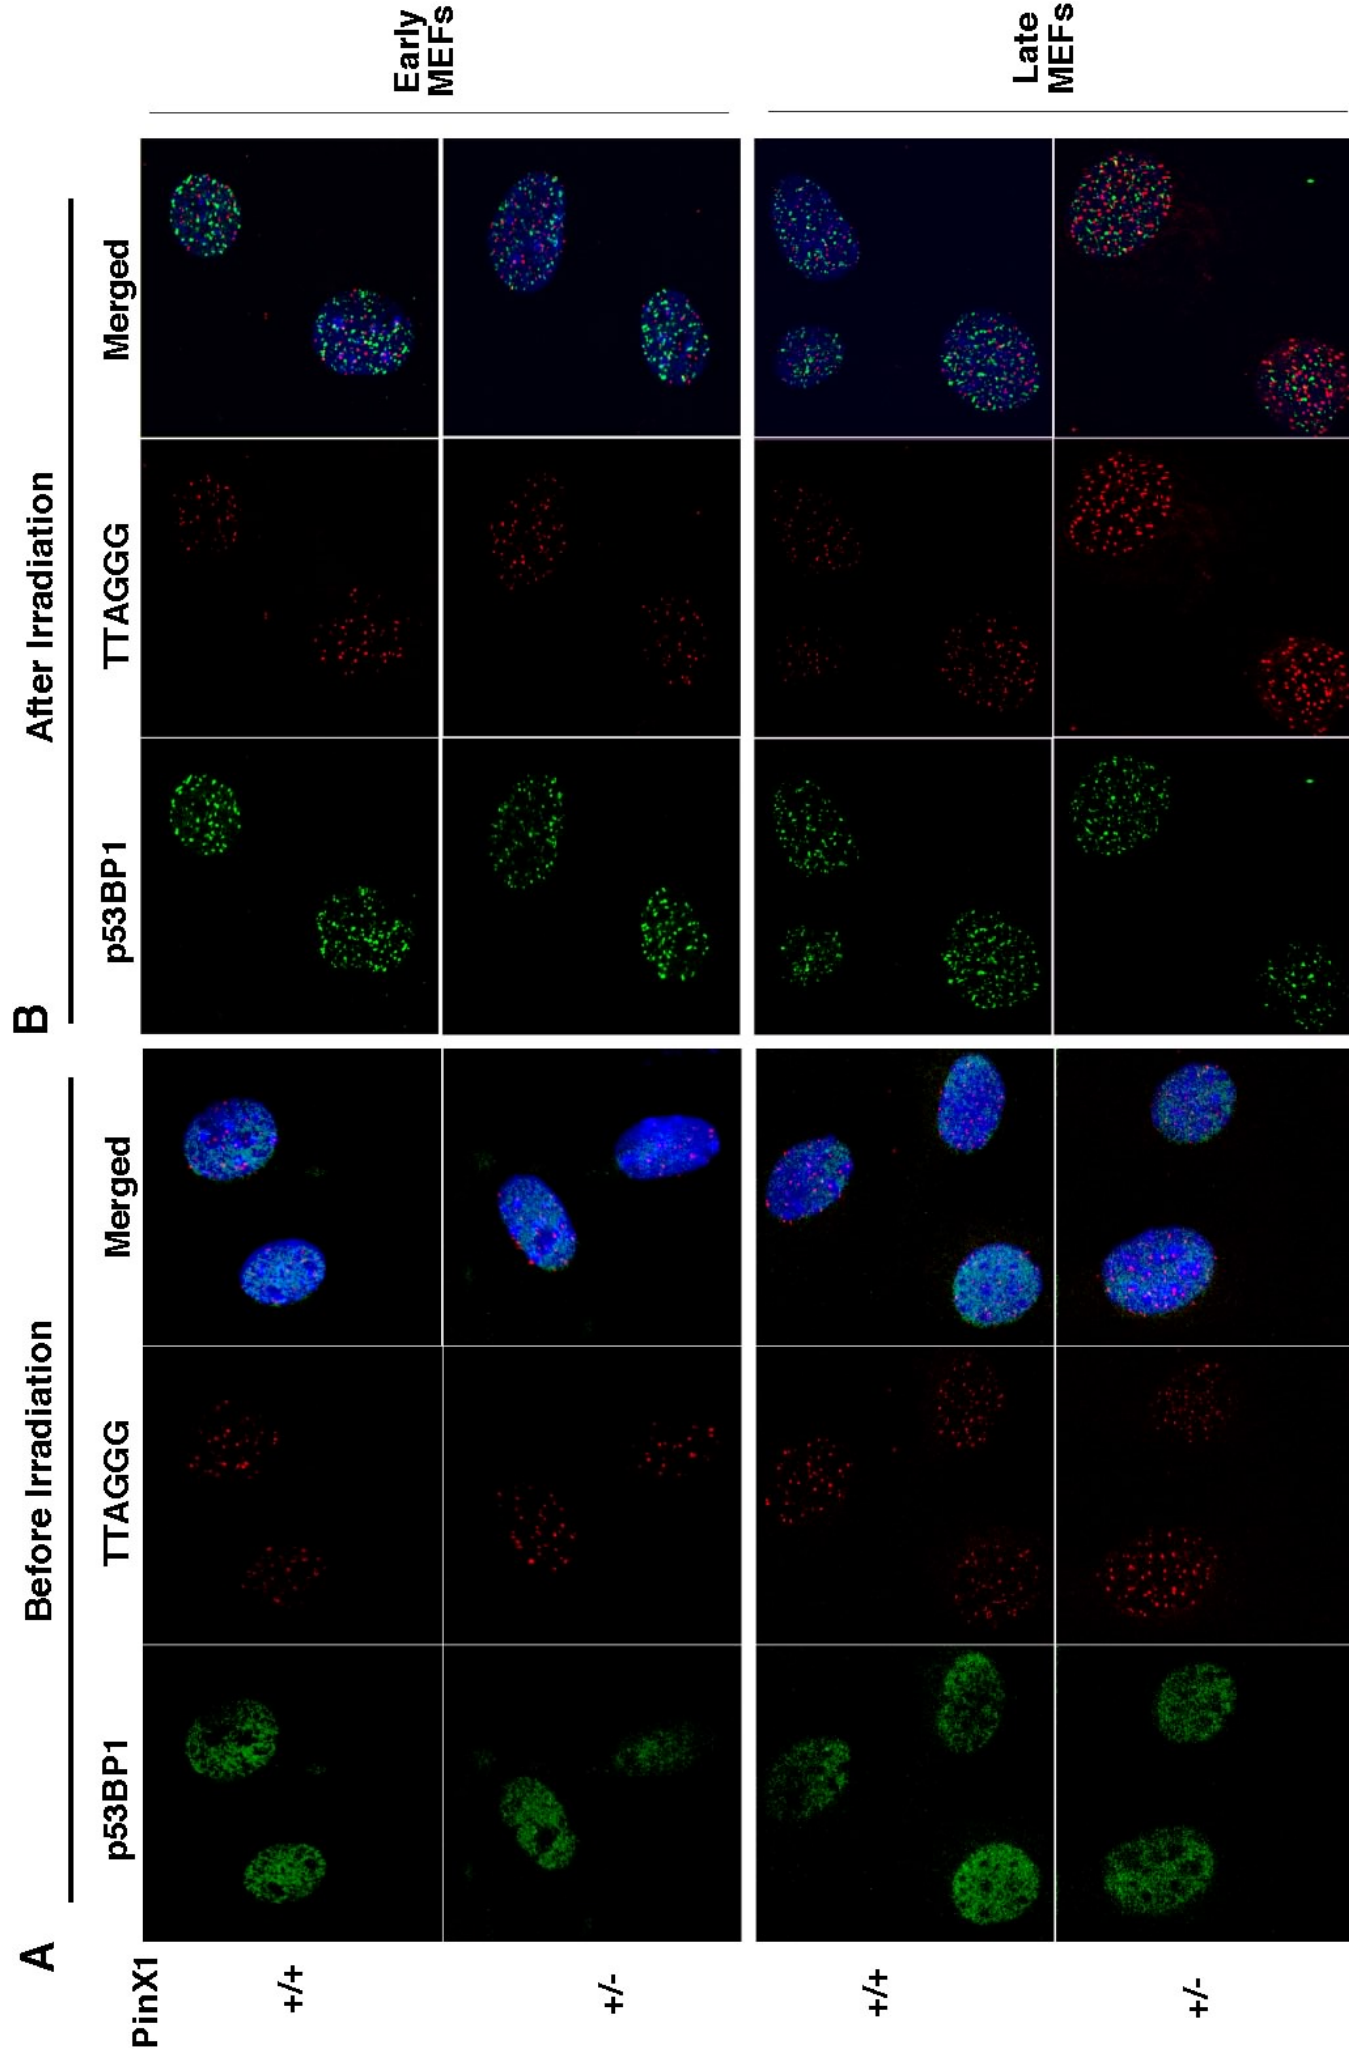

**Zhou et al., Fig. S4. PinX1 heterozygous knockout does not induce obvious telomere-mediated DNA damage.** PinX1<sup>+/-</sup> MEFs before (A) and after (B)  $\gamma$ -radiation were subjected to p53BP1 immunostaining (green) and telomere FISH (red) as well as DNA staining (blue) before confocal microscopy.



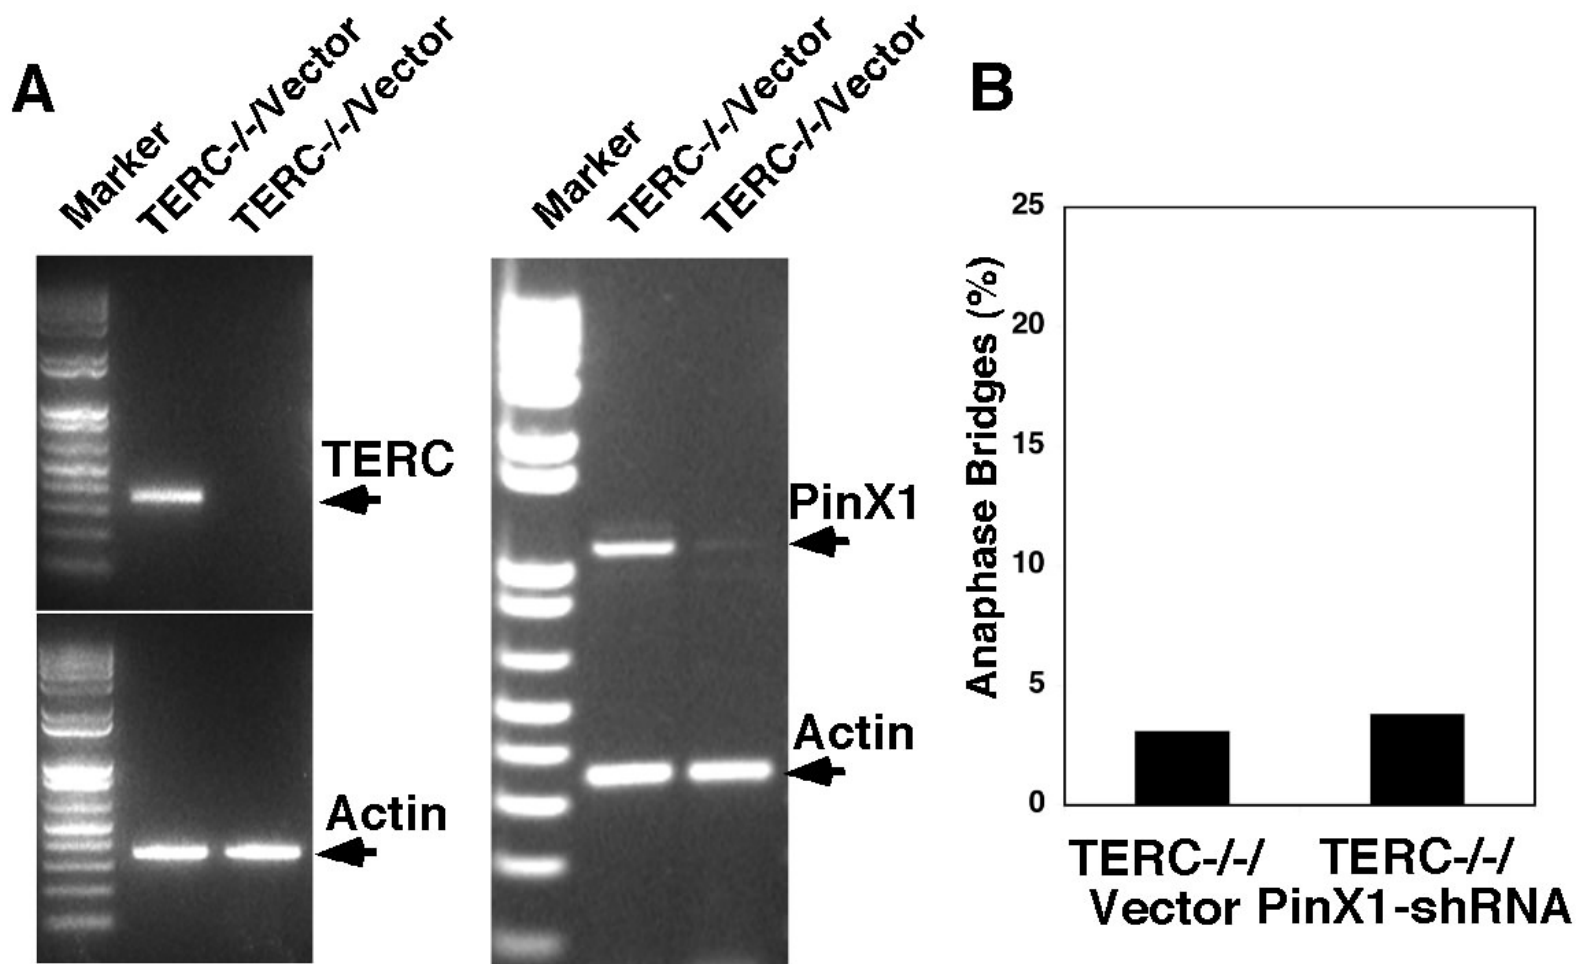

**Zhou et al., Fig. S5. PinX1 knockdown does not induce anaphase bridges and/or lagging chromosomes in TERC-/- MEFs.**

MEFs derived from G1 TERC-/- mice were stably infected with PinX1-shRNA or vector control lentiviruses, followed by RT-PCR analysis to confirm TERC knockout and PinX1 knockdown (A) as well as scoring for anaphase bridges and/or lagging chromosomes after continuous cell culture in vitro (B).

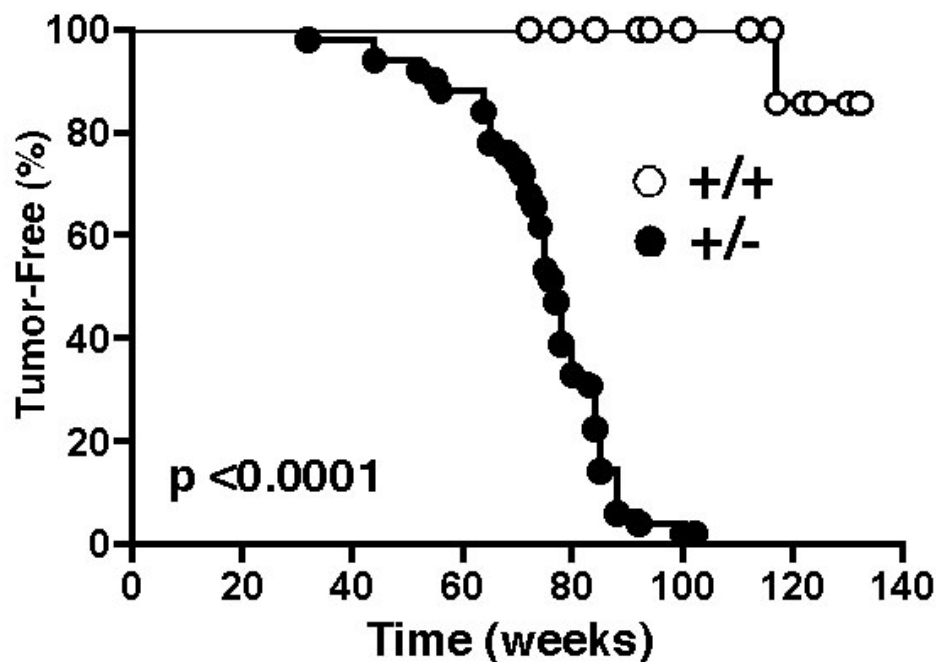

**Zhou et al., Fig. S6. Most PinX1 knockout mice develop tumors.**

PinX1<sup>+/-</sup> animals were intercrossed to obtain the experimental cohorts that were followed for the development of tumors (Table S1) and subjected to Kaplan-Meier analysis. The data were plotted as the percent tumor-free of PinX1<sup>+/+</sup> (n = 15) and PinX1<sup>+/-</sup> (n = 52) cohort mice versus age in weeks. The tumor differences between PinX1<sup>+/+</sup> and PinX1<sup>+/-</sup> mice were highly significant (p < 0.0001).

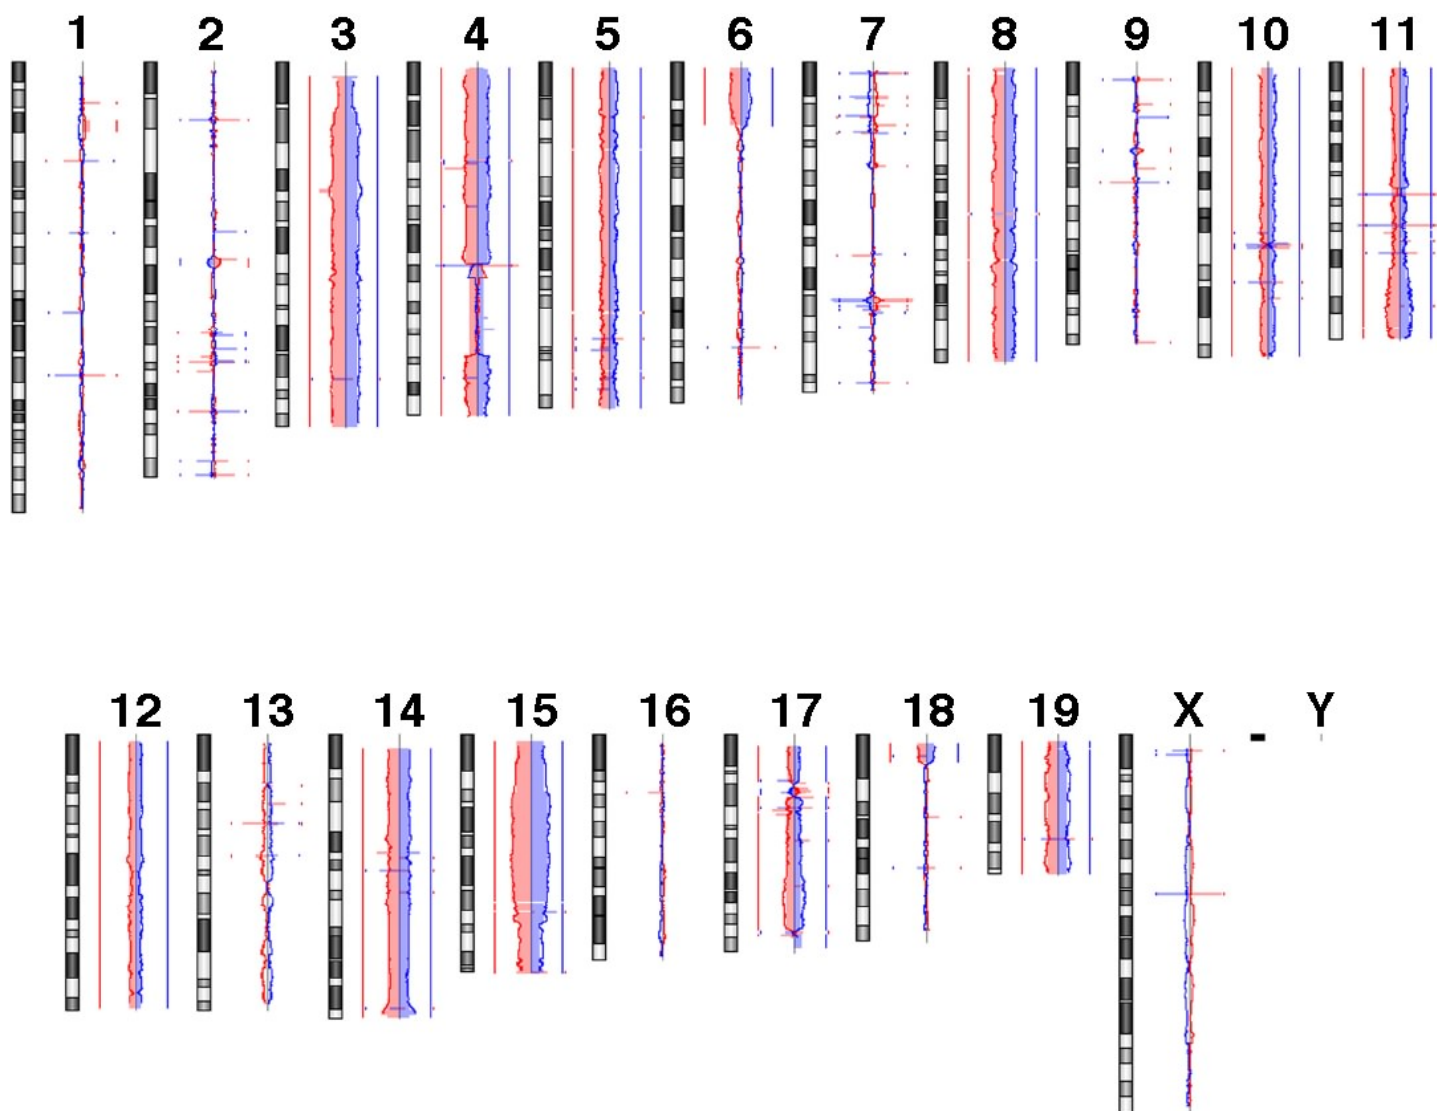

**Zhou et al., Fig. S7. PinX1<sup>+/-</sup> tumors show widespread chromosomal imbalances, as shown by genome-wide aCGH analysis.**
